# Supplementary material
Source: publisher site journal article supplement (https://www.dovepress.com/article/480744)
Supplement: Supplementary file 1 [file get_supplementary_file.php]

Supplementary Material

Supplementary Figures


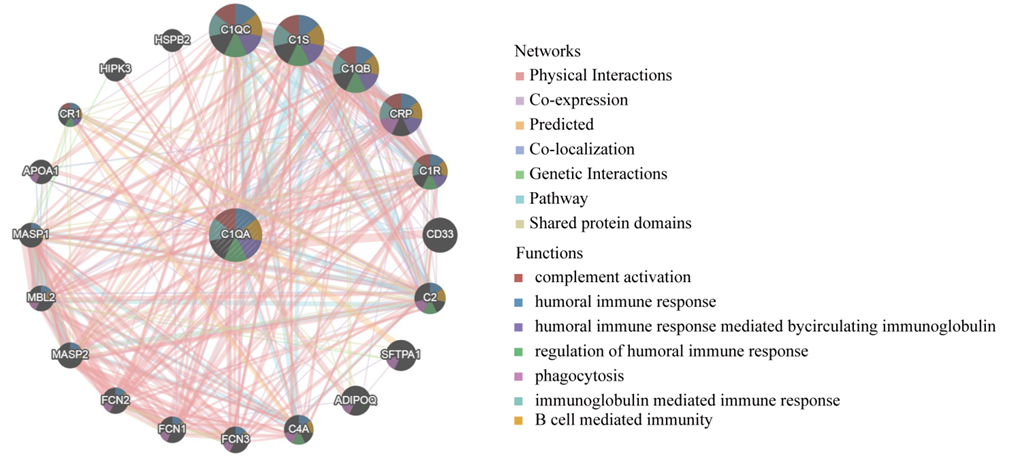


Figure S1**A**. The PPI network of C1QA and its functional analysis come from GeneMANIA.


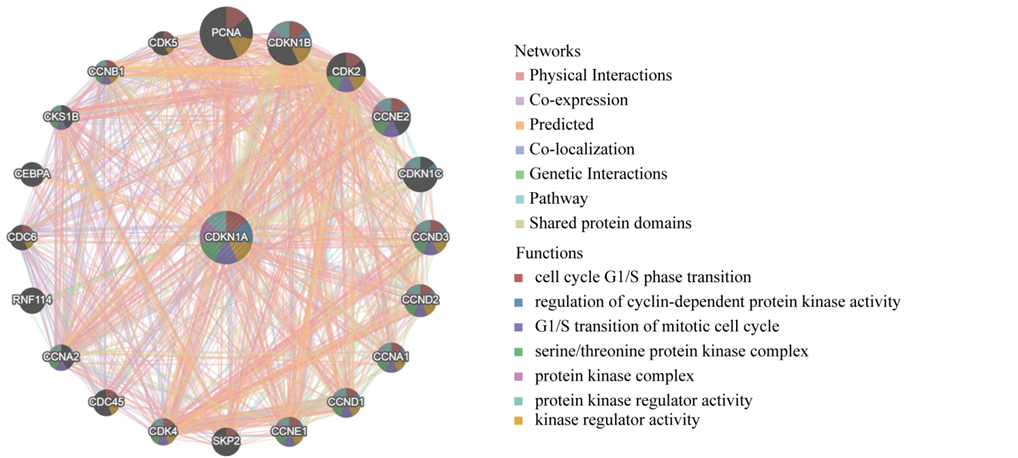
Figure S1**B**. The PPI network of CDKN1A and its functional analysis come from GeneMANIA.
